# Supplementary material for: Arthroscopic suture retrievers and shuttles: a biomechanical investigation of the force required for tendon penetration and defect size
Source: Springer Nature journal article supplement (doi:10.1186/s12891-015-0794-9), 2015-11-17
Supplement: MOESM1 [file 9752798]

| SUTURE RETRIEVER                                   |                                                                                     | FORCE (in N/mm) | LESION SIZE (in mm <sup>2</sup> ) | Force (N/mm) / Lesion (mm <sup>2</sup> ), mean | Force (N/mm) / Lesion (mm <sup>2</sup> ), mean |  |
|----------------------------------------------------|-------------------------------------------------------------------------------------|-----------------|-----------------------------------|------------------------------------------------|------------------------------------------------|--|
| <b>Straight</b>                                    |                                                                                     |                 |                                   |                                                |                                                |  |
| Arthrex™ Penetrator Suture Retriever II® Straight  |    | 6 <sup>+</sup>  | 4.2 <sup>+</sup>                  | 9 <sup>†</sup><br><u>5.1</u>                   | 12<br><u>4.9</u> <sup>*</sup>                  |  |
| Arthrex™ Rhino® Straight Tip                       |    | 8 <sup>+</sup>  | 4.5 <sup>+</sup>                  |                                                |                                                |  |
| Smith & Nephews™ Arthropiercer® Straight           |    | 11              | 5.8                               |                                                |                                                |  |
| Tornier™ Penetrating Grasper® Straight             |    | 10              | 5.9                               |                                                |                                                |  |
| <b>Angled</b>                                      |                                                                                     |                 |                                   |                                                |                                                |  |
| Arthrex™ Penetrator Suture Retriever II® 15° Up    |    | <b>19</b>       | 6.1                               | 13 <sup>†</sup><br><u>4.9</u>                  |                                                |  |
| Biomet™ Arthropasser® 35° Up                       |    | 10              | 3.3 <sup>+</sup>                  |                                                |                                                |  |
| Biomet™ Arthropasser® 45° Left                     |    | 8 <sup>+</sup>  | 4.3 <sup>+</sup>                  |                                                |                                                |  |
| Smith & Nephews™ ArthroPiercer® 35° Up             |    | 9               | 5.8                               |                                                |                                                |  |
| Smith & Nephews™ ArthroPiercer® 45° Right          |    | 15              | <b>7</b>                          |                                                |                                                |  |
| Tornier™ Birdbeak® 35° Up                          |    | 13              | 3 <sup>+</sup>                    |                                                |                                                |  |
| Tornier™ Birdbeak® 45° Right                       |   | 15              | 4.9                               |                                                |                                                |  |
| Tornier™ CleverHook® Right                         |  | 17              | 4.5 <sup>+</sup>                  |                                                |                                                |  |
| <b>SUTURE SHUTTLE</b>                              |                                                                                     |                 |                                   |                                                |                                                |  |
| <b>Straight</b>                                    |                                                                                     |                 |                                   |                                                |                                                |  |
| Arthrex™ Suture Lasso® SD Crescent                 |  | 10              | 3.7 <sup>+</sup>                  | 9<br><u>3.3</u>                                | 10<br><u>3.1</u> <sup>*</sup>                  |  |
| Smith & Nephews™ Accu-Pass® Big Curve              |  | 8 <sup>+</sup>  | 3.9 <sup>+</sup>                  |                                                |                                                |  |
| Smith & Nephews™ Accu-Pass® Crescent               |  | 10              | 2.3 <sup>+</sup>                  |                                                |                                                |  |
| <b>Angled</b>                                      |                                                                                     |                 |                                   |                                                |                                                |  |
| Arthrex™ Quick Pass Lasso® 90° Curve Straight      |  | 11              | 2 <sup>+</sup>                    | 10<br><u>3</u>                                 |                                                |  |
| Arthrex™ SutureLasso® SD 25° Tight Curve Left      |  | 11              | 3.1 <sup>+</sup>                  |                                                |                                                |  |
| ConMed Linvatec™ Spectrum® Suture Passer 45° Right |  | 8 <sup>+</sup>  | 2.7 <sup>+</sup>                  |                                                |                                                |  |
| ConMed Linvatec™ Spectrum® Suture Passer 60° Right |  | 11              | 3 <sup>+</sup>                    |                                                |                                                |  |
| Smith & Nephews™ Accu-Pass® Suture Shuttle 70°     |  | 10              | 2.9 <sup>+</sup>                  |                                                |                                                |  |
| Smith & Nephews™ Suture Shuttle® Left 45° Curve    |  | 9               | 4.5 <sup>+</sup>                  |                                                |                                                |  |

**Table 1: Listing and illustration of all instruments used in respect to separation and subdivision.** The mean values in N/mm and area in mm<sup>2</sup> are shown of each instrument as well as of comparison of Suture Retrievers and Suture Shuttles and straight and angled instruments within each group. Values marked with identical symbol were compared and showed significant differences. Instruments, which showed a significantly less force or lesion size of all Instruments in comparison to the Arthrex™ Penetrator Suture Retriever II® 15° Up (bold) are marked for Force in N/mm (+) and for the area in mm<sup>2</sup> in comparison to the Smith & Nephews™ ArthroPiercer® 45° Right (bold).
